1 **Title**

2 Assessing equitable use of large language models for clinical decision support in real-world  
3 settings: fine-tuning and internal-external validation using electronic health records from  
4 South Asia

5 **Authors**

6 Seyed Alireza Hasheminasab, PhD<sup>1</sup>, Faisal Jamil, MCS<sup>2</sup>, Muhammad Usman Afzal, MCS<sup>2</sup>,  
7 Ali Haider Khan, BSc<sup>2</sup>, Sehrish Ilyas, BSc<sup>2</sup>, Ali Noor, BSc<sup>2</sup>, Salma Abbas, MBBS, MPH<sup>2</sup>,  
8 Hajira Nisar Cheema, MBBS<sup>2</sup>, Muhammad Usman Shabbir, MBBS<sup>2</sup>, Iqra Hameed, MBBS<sup>2</sup>,  
9 Maleeha Ayub, MBBS<sup>2</sup>, Hamayal Masood, MBBS<sup>2</sup>, Amina Jafar, MBBS<sup>2</sup>, Amir Mukhtar Khan,  
10 MSc<sup>2</sup>, Muhammad Abid Nazir, MSc<sup>2</sup>, Muhammad Asaad Jamil, MSc<sup>2</sup>, Faisal Sultan, MBBS,  
11 FRCP, FCPS<sup>2</sup>, Sara Khalid DPhil<sup>1</sup>

12 <sup>1</sup> Centre for Statistics in Medicine (CSM), Nuffield Department of Orthopaedics,  
13 Rheumatology and Musculoskeletal Sciences (NDORMS), University of Oxford, Oxford,  
14 United Kingdom.

15 <sup>2</sup> Shaukat Khanum Memorial Cancer Hospital and Research Centre, Lahore, Punjab,  
16 Pakistan.

17 **Corresponding Author:** Sara Khalid, Centre for Statistics in Medicine, Botnar Institute for  
18 Musculoskeletal Sciences, Windmill Road, Oxford, OX3 7LD, United Kingdom, telephone  
19 number: 0044-1865227374, email address: sara.khalid@ndorms.ox.ac.uk

20

## 21 **Abstract**

### 22 **Objective**

23 Fair and safe Large Language Models (LLMs) hold the potential for clinical task-shifting  
24 which, if done reliably, can benefit over-burdened healthcare systems, particularly for  
25 resource-limited settings and traditionally overlooked populations. However, this powerful  
26 technology remains largely understudied in real-world contexts, particularly in the global  
27 South. This study aims to assess if openly available LLMs can be used equitably and reliably  
28 for processing medical notes in real-world settings in South Asia.

### 29 **Methods**

30 We used publicly available medical LLMs to parse clinical notes from a large electronic  
31 health records (EHR) database in Pakistan. ChatGPT, GatorTron, BioMegatron, BioBert and  
32 ClinicalBERT were tested for bias when applied to these data, after fine-tuning them to a)  
33 publicly available clinical datasets I2B2 and N2C2 for medical concept extraction (MCE) and  
34 emrQA for medical question answering (MQA), and b) the local EHR dataset. For MCE  
35 models were applied to clinical notes with 3-label and 9-label formats and for MQA were  
36 applied to medical questions. Internal and external validation performance was measured for  
37 a) and b) using F1, precision, recall, and accuracy for MCE and BLEU and ROUGE-L for  
38 MQA.

### 39 **Results**

40 LLMs not fine-tuned to the local EHR dataset performed poorly, suggesting bias, when  
41 externally validated on it. Fine-tuning the LLMs to the local EHR data improved model  
42 performance. Specifically, the 3- label precision, recall, F1 score, and accuracy for the  
43 dataset improved by 21-31%, 11-21%, 16-27%, and 6-10% amongst GatorTron,  
44 BioMegatron, BioBert and ClinicalBERT. As an exception, ChatGPT performed better on the  
45 local EHR dataset by 10% for precision and 13% for each of recall, F1 score, and accuracy.  
46 9-label performance trends were similar.

## 47 **Conclusions**

48 Publicly available LLMs, predominantly trained in global north settings, were found to be  
49 biased when used in a real-world clinical setting. Fine-tuning them to local data and clinical  
50 contexts can help improve their reliable and equitable use in resource-limited settings. Close  
51 collaboration between clinical and technical experts can ensure responsible and unbiased  
52 powerful tech accessible to resource-limited, overburdened settings used in ways that are  
53 safe, fair, and beneficial for all.

## 54 **Introduction**

55 Medical Large Language Models (LLMs) propose to leverage the power of multi-billion-  
56 parameter neural networks to unlock, summarise, and present medical information quickly  
57 and easily, to boost clinical decision-making. Ultimately, by extracting insights from massive  
58 volumes of clinical notes with unprecedented speed and accuracy, LLMs can potentially feed  
59 a variety of task-shifting applications including, and not limited to, frontline worker decision-  
60 support, clinical trial selection for life-saving treatments, culturally appropriate medical  
61 training, medical data discovery and evidence generation.[1-4] If done reliably and speedily,  
62 such use of LLMs can benefit over-burdened healthcare systems everywhere, but  
63 particularly in resource-limited settings such as South Asia, home to a quarter of the world's  
64 population, and where rural and urban health facilities are largely over-subscribed and under  
65 pressure.

66 However, the technology is still in its infancy and lacks clinical uptake.[5-10] Little is known  
67 about how LLMs perform in real-world settings, and if they are fair, safe, ethical, and trusted  
68 in bespoke settings.[11] Despite the recent surge in language-based models such as  
69 ChatGPT-4,[12] the validation of their clinical applications and robust regulatory debate over  
70 their use is still lacking, hindering their uptake within resource-limited healthcare settings.

71 Electronic health records (EHRs), including clinical notes, represent enormous repositories  
72 of information to aid patient care. However, the efficient use of these data sources is  
73 impeded by a lack of syntactic, structural, and semantic interoperability and standardization.

74 LLMs stand ready as invaluable tools to overcome these challenges, promising enhanced  
75 interpretation and knowledge retrieval within the intricate landscape of healthcare data.

76 Often, key subjective information including family history, drug adverse events and social,  
77 behavioural, and environmental determinants of health - all of which are commonly required  
78 in time-critical decision-making - is well-documented only within the full-text patient notes of  
79 EHRs.[13] Used in combination with structured data, this information can provide key  
80 contextual, socio-demographic and cultural nuances to improve health care, especially for  
81 traditionally marginalised communities with limited health access and representation in  
82 health data.

83 LLMs hold promise to improve healthcare and reduce health disparities through their ability  
84 to process these data-rich sources and provide critical information to clinicians. The use of  
85 these models could hold particular benefits for traditionally overlooked groups, including  
86 women, children, and socio-economically or otherwise deprived populations; however, these  
87 impacts are only possible if the underlying models prevent the exacerbation of biases.

88 Although AI bias can be multi-faceted, two main sources are a) unrepresentative training and  
89 testing data, and b) algorithmic bias. Most AI tools have been developed in global North  
90 settings using data from high-income demographics.[14] Ensuing models may therefore be  
91 under-representative of low-income geographies and populations, resulting in algorithmic  
92 assumptions about gender, race, and geography, socio-economic status, etc. Concealed  
93 biases within LLMs could have severe repercussions on patient outcomes, and render them  
94 unsuitable for use with diverse, global populations.[15-17]

95 In this paper, we studied the strengths and limitations of LLMs in a real-world, global South  
96 clinical setting. We tested, and independently validated, publicly available LLMs on a large  
97 local EHR database from South Asia. To assess bias, we compared model performance with  
98 and without fine-tuning the model to the local dataset. We assessed both internal and  
99 external validation by testing the performance of models fine-tuned on the local EHR dataset  
100 on open datasets, and vice versa (Figure 1). Models were used to parse clinical notes. This

101 approach is disease-agnostic and generalisable to other downstream uses of LLMs such as  
102 summarisation, inference and more. Key contributions of this study include a demonstration  
103 of the challenges and opportunities in the use of LLMs in real-world, resource-limited  
104 settings. This work opens up avenues to further study the potential of LLMs to empower  
105 clinical decision-making and enable task-shifting which is beneficial for all.

## 106 **Methods**

### 107 **Data source**

108 The Shaukat Khanum Memorial Cancer Hospital and Research Centre (SKMCH&RC)  
109 ([www.shaukatkhanum.org.pk](http://www.shaukatkhanum.org.pk)) is a secondary and tertiary care hospital network spanning 70  
110 cities in Pakistan. Its electronic health records database contains free-text notes and  
111 structured data for 8.2 million actively registered patients (51% women).[18] It is linked with  
112 the Punjab Cancer Registry and contains anonymised, de-identified patient-level data on  
113 socio-demographics, laboratory results, clinical history, diagnoses, outcomes,  
114 prescriptions/dispensations, hospital in-patient procedures, and mortality from December  
115 1994 to the present (1st June 2022). The SKMCH&RC dataset contains two types of free-  
116 text notes: DS notes and SOAP notes.

117 **Inpatient Discharge Summary (DS) Notes.** DS notes represent a comprehensive summary  
118 of a patient's hospitalization, including diagnostic information, procedures performed,  
119 medications administered, and post-discharge instructions. Patient demographics, admission  
120 and discharge dates, primary consultants, and detailed information about the patient's  
121 condition are documented under "Diagnosis During This Admission," "Background Medical  
122 Problem(s)," and "Management During Admission" headings. These data can provide  
123 subjective information not necessarily captured in structured codes.

124 **Subjective, Objective, Assessment, and Plan Notes (SOAP).** SOAP notes offer a  
125 structured approach to documenting patient information in 4 sections.

- 126        1) Subjective: Patient symptoms, history, and any information provided by the patient or  
127            caregiver.
- 128        2) Objective: Objective observations, laboratory results, and imaging data.
- 129        3) Assessment: Diagnosis, problem list, and a summary of the patient's health status.
- 130        4) Plan: Detailed plans for treatment, medications, follow-up, and any other relevant  
131            actions.

132        SOAP notes provide a nuanced understanding of patient cases, ranging from diagnostic  
133        workups to treatment plans. Key entities in the dataset include patient demographics,  
134        medical history, diagnostic findings, treatment plans, and follow-up instructions.

### 135        **Labelling Clinical Notes**

136        A team of six clinical experts including resident doctors labelled the DS and SOAP notes  
137        both for concept extraction and question answering tasks. Using a consensus approach, a  
138        label/answer with the highest level of agreement between the team was considered the  
139        “true” label. The labelled dataset was double-checked by the resident supervisory doctor. A  
140        token was considered to be the smallest unit of text that a given model can read such as a  
141        word, sub-word, or character. For concept extraction, each token was labelled using the  
142        Inside-Outside-Beginning (BIO) format. For each expression, the first token was labelled with  
143        "B" followed by tokens within the expression labelled with "I" and tokens outside the  
144        expression labelled with "O".

### 145        **Medical LLMs**

146        In addition to OpenAI's ChatGPT as a trained general-purpose language model, 4 publicly  
147        available medical large language models (Table 1) designed for parsing medical notes were  
148        used, namely GatorTron(base), BioMegatron, ClinicalBERT, and BioBERT.[19-22] These  
149        open-source models are available pre-trained on extensive medical datasets, allowing them  
150        to acquire a nuanced understanding of both medical terminology and English text structures.  
151        Pre-training equips the models with a comprehensive grasp of medical concepts and  
152        proficiency in medical context and vocabulary. Additional fine-tuning layers allow these

153 models to be used for tasks such as clinical concept extraction, medical relation extraction,  
154 natural language inference, semantic textual similarity, medical event prediction, and  
155 question answering.

156

157 Table 1: Pre-trained clinical LLMs used in the study.

|                | Model Size      | Training Data                                                                                                                                                                                |
|----------------|-----------------|----------------------------------------------------------------------------------------------------------------------------------------------------------------------------------------------|
| GatorTron base | 354M parameters | Clinical narratives from the University of Florida Health Integrated Data Repository, MIMIC III<br>Combining PubMed abstracts and full-text commercial-collection<br>Wikipedia articles dump |
| BioMegatron    | 334M parameters | Wikipedia<br>CC-Stories<br>Real news<br>Open Web text<br>PubMed abstract set<br>Commercial Use Collection of the PubMed Central® full-text corpus                                            |
| ClinicalBERT   | 135M parameters | MIMIC III                                                                                                                                                                                    |
| BioBERT        | 107M parameters | PubMed abstracts<br>PubMed Central full-text articles                                                                                                                                        |
| ChatGPT        | 137B parameters | Specific data sources are not publicly disclosed.<br>A variety of sources, including publicly available web pages, books, and code repositories                                              |

158

### 159 **Fine-tuning LLMs**

160 Each LLM is available pre-trained on large volumes of data (Table 1). In this study, we fine-  
161 tuned each pre-trained LLM for the task of parsing DS and SOAP notes through named  
162 entity recognition (NER), which involves identifying specific entities in medical records. Aside  
163 from ChatGPT which was trained by OpenAI, each LLM was separately fine-tuned on a)  
164 publicly available datasets i2b2 2010 (3 labels: treatment, test, problem), and n2c2 (9 labels:  
165 Duration, Frequency, Strength, Form, Route, Dosage, Reason, ADE, Drug), and emrQA (for  
166 question answering task), and b) the SKMCH&RC dataset for each corresponding task.

167 Publicly available datasets were pre-segmented into training and testing sets. The  
168 SKMCH&RC dataset was randomly split into training (80%) and test (20%) sets.

### 169 **Model Performance: Internal and external validation**

170 LLMs fine-tuned on i2b2 2010, n2c2, and emrQA training sets were internally validated on  
171 their respective test sets. They were then externally validated on the SKMCH&RC test set.

172 Similarly, LLMs fine-tuned on the SKMCH&RC train set were internally validated on the  
173 SKMCH&RC test set and externally validated on the i2b2 2010, n2c2, and emrQA test sets.

174 ChatGPT was tested on the SKMCH&RC dataset without fine-tuning.

### 175 **Evaluation of Bias**

176 Model performance was measured using F1 Score, precision, recall, and accuracy for the  
177 medical concept extraction and BLEU and ROUGE-L for question answering task. Confusion  
178 matrices were produced to assess label-specific misclassification.

179 All the presented open-source LLMs are accessible through the Hugging Face website at no  
180 cost, except for ChatGPT, which requires a paid subscription. To conduct fine-tuning and  
181 evaluate model performance, we utilized a Google Colaboratory account with a paid  
182 subscription, equipped with an A100 GPU.

### 183 **Results**

184 A total of 200 free-text notes, including 50 DS and 150 SOAP notes were randomly extracted  
185 from the SKMCH&RC dataset for a two-year period from 01-Jan-2020 to 21-Nov-2021. One  
186 note per patient was extracted; the notes represented a patient population including 46%  
187 men and 54% women; 89% were adults (defined as aged 19-87 years).

188 This included 284,445 expert-labelled tokens in BIO format, including 140,841 tokens  
189 representing the 3 classes and 143,604 tokens representing the 9 classes. In comparison,  
190 the public datasets contained a total number of 2,485,556 BIO tokens, including 1,314,036



191 tokens representing the 3 classes and 1,171,520 tokens representing the 9 classes. Table 2  
 192 displays fine-tuning and internal/external testing dataset statistics.

193 Table 2: Datasets used for fin-tuning and internal and external validation.

|                                          | Publicly accessible                                            |                                                                                                                          | Real-world EHR database                                        |                                                                                                                          |
|------------------------------------------|----------------------------------------------------------------|--------------------------------------------------------------------------------------------------------------------------|----------------------------------------------------------------|--------------------------------------------------------------------------------------------------------------------------|
| Name                                     | i2b2-2010,                                                     | n2c2-2018,                                                                                                               | SKMCH&RC                                                       | SKMCH&RC                                                                                                                 |
| N labels                                 | 3 Labels                                                       | 9 Labels                                                                                                                 | 3 Labels                                                       | 9 Labels                                                                                                                 |
| sample sizes                             | 170 Train files,                                               | 204 Train Files,                                                                                                         | 200 files                                                      | 200 files                                                                                                                |
|                                          | 256 Test files                                                 | 204 Test Files                                                                                                           |                                                                |                                                                                                                          |
| train/validation splits                  | 90/10                                                          | 80/20                                                                                                                    | Train (60%), validation (10%), and test (30%)                  | Train (60%), validation (10%), and test (30%)                                                                            |
|                                          | Train: 152,                                                    | Train: 163                                                                                                               | Train: 120                                                     | Train: 120                                                                                                               |
|                                          | Validation: 18                                                 | Validation:41                                                                                                            | Validation: 20                                                 | Validation: 20                                                                                                           |
|                                          | Test: 256                                                      | Test:204                                                                                                                 | Test: 60                                                       | Test: 60                                                                                                                 |
| Notes Structure                          | Original text from i2b2_2010 files                             | Original text from n2c2_2018 files                                                                                       | 150 SOAP notes and 50 Discharge Summaries                      | 150 SOAP notes and 50 Discharge Summaries                                                                                |
| Labels<br>Number of resulting BIO labels | ['treatment', 'test', 'problem']<br><b>N of BIO labels = 7</b> | ['Duration', 'Frequency', 'Strength', 'Form', 'Route', 'Dosage', 'Reason', 'ADE', 'Drug']<br><b>N of BIO labels = 19</b> | ['treatment', 'test', 'problem']<br><b>N of BIO labels = 7</b> | ['Duration', 'Frequency', 'Strength', 'Form', 'Route', 'Dosage', 'Reason', 'ADE', 'Drug']<br><b>N of BIO labels = 19</b> |

194

195 **Model Performance**

196 Model performance for internal and external validation is summarised in Table 3.

197 Table 3: Concept extraction model performance for internal and external validation of LLMs fine-tuned on publicly available and SKMCH&RC datasets. In  
 198 this table, each row indicates whether fine-tuning and testing were conducted on public or SKMCH&RC datasets. By referencing the number of labels in each  
 199 column, the dataset used can be inferred. For instance, the combination of "public" and "3-label" implies the utilization of the public dataset with a 3-label  
 200 or I2B2 dataset.

| Model Name                                             | GatorTronBioMegatron Base         | Clinical_BERT                     | Bio_BERT                          | ChatGPT                           | GatorTron_Base | BioMegatron                       | ClinicalBERT                      | BioBERT                           | ChatGPT                           |               |
|--------------------------------------------------------|-----------------------------------|-----------------------------------|-----------------------------------|-----------------------------------|----------------|-----------------------------------|-----------------------------------|-----------------------------------|-----------------------------------|---------------|
| Label Format                                           | 3-Label                           |                                   |                                   |                                   | 9-Label        |                                   |                                   |                                   |                                   |               |
| Precision<br>Finetuned on Public<br>Tested on Public   | <b>0.8303</b><br>[0.8256, 0.8368] | <b>0.8575</b><br>[0.8509, 0.8619] | <b>0.8612</b><br>[0.8567, 0.8651] | <b>0.8641</b><br>[0.8584, 0.8704] | <b>0.8114</b>  | <b>0.9555</b><br>[0.9516, 0.9599] | <b>0.946</b><br>[0.9411, 0.9499]  | <b>0.9316</b><br>[0.9254, 0.9376] | <b>0.9476</b><br>[0.9436, 0.9523] | <b>0.9124</b> |
| Recall<br>Finetuned on Public<br>Tested on Public      | <b>0.8448</b><br>[0.8305, 0.8579] | <b>0.8736</b><br>[0.8617, 0.8826] | <b>0.8791</b><br>[0.8679, 0.888]  | <b>0.869</b><br>[0.8578, 0.8788]  | <b>0.76</b>    | <b>0.9625</b><br>[0.9591, 0.9668] | <b>0.956</b><br>[0.9502, 0.9605]  | <b>0.9462</b><br>[0.9419, 0.9512] | <b>0.9678</b><br>[0.9653, 0.9714] | <b>0.6978</b> |
| F1<br>Finetuned on Public<br>Tested on Public          | <b>0.8375</b><br>[0.8288, 0.8447] | <b>0.8655</b><br>[0.8569, 0.872]  | <b>0.8701</b><br>[0.8623, 0.8746] | <b>0.8665</b><br>[0.8581, 0.8746] | <b>0.7667</b>  | <b>0.959</b><br>[0.9556, 0.9628]  | <b>0.951</b><br>[0.9546, 0.9546]  | <b>0.9388</b><br>[0.9339, 0.9441] | <b>0.9576</b><br>[0.9548, 0.9615] | <b>0.7496</b> |
| Accuracy<br>Finetuned on Public<br>Tested on Public    | <b>0.9584</b><br>[0.9564, 0.9607] | <b>0.9507</b><br>[0.9477, 0.9531] | <b>0.948</b><br>[0.9449, 0.9498]  | <b>0.9463</b><br>[0.9429, 0.9492] | <b>0.76</b>    | <b>0.9934</b><br>[0.993, 0.9938]  | <b>0.9899</b><br>[0.9892, 0.9904] | <b>0.9934</b><br>[0.9859, 0.9875] | <b>0.9903</b><br>[0.9895, 0.9908] | <b>0.6978</b> |
| Precision<br>Finetuned on Public<br>Tested on SKMCH&RC | <b>0.5278</b><br>[0.5142, 0.5495] | <b>0.6575</b><br>[0.6323, 0.6746] | <b>0.6307</b><br>[0.6051, 0.646]  | <b>0.6442</b><br>[0.6214, 0.6594] | <b>0.9214</b>  | <b>0.7468</b><br>[0.728, 0.7667]  | <b>0.7368</b><br>[0.7187, 0.7542] | <b>0.7468</b><br>[0.728, 0.7667]  | <b>0.74</b><br>[0.7206, 0.7616]   | <b>0.9156</b> |
| Recall<br>Finetuned on Public<br>Tested on SKMCH&RC    | <b>0.644</b><br>[0.6195, 0.6726]  | <b>0.7736</b><br>[0.7538, 0.7906] | <b>0.7522</b><br>[0.7321, 0.7664] | <b>0.7603</b><br>[0.7413, 0.7745] | <b>0.9118</b>  | <b>0.8214</b><br>[0.81, 0.832]    | <b>0.8278</b><br>[0.8181, 0.8365] | <b>0.8214</b><br>[0.81, 0.832]    | <b>0.7941</b><br>[0.7822, 0.8093] | <b>0.8716</b> |

|                                                                               |                                      |                                      |                                      |                                      |               |                                   |                                      |                                      |                                      |               |
|-------------------------------------------------------------------------------|--------------------------------------|--------------------------------------|--------------------------------------|--------------------------------------|---------------|-----------------------------------|--------------------------------------|--------------------------------------|--------------------------------------|---------------|
| <b>F1<br/>Finetuned on Public<br/>Tested on<br/>SKMCH&amp;RC</b>              | <b>0.5801</b><br>[0.5629,<br>0.6019] | <b>0.7108</b><br>[0.6923,<br>0.728]  | <b>0.6861</b><br>[0.6642,<br>0.6999] | <b>0.6974</b><br>[0.6808,<br>0.7103] | <b>0.9097</b> | <b>0.7823</b><br>[0.7729, 0.7961] | <b>0.7797</b><br>[0.7691,<br>0.7913] | <b>0.7823</b><br>[0.7729,<br>0.7961] | <b>0.766</b><br>[0.7545,<br>0.7847]  | <b>0.8853</b> |
| <b>Accuracy<br/>Finetuned on Public<br/>Tested on<br/>SKMCH&amp;RC</b>        | <b>0.8906</b><br>[0.8833,<br>0.8973] | <b>0.8705</b><br>[0.8615,<br>0.8787] | <b>0.8498</b><br>[0.8406,<br>0.8573] | <b>0.8502</b><br>[0.8428,<br>0.8582] | <b>0.9118</b> | <b>0.9556</b><br>[0.9511, 0.9597] | <b>0.9446</b><br>[0.9391,<br>0.9497] | <b>0.9556</b><br>[0.9511,<br>0.9597] | <b>0.9229</b><br>[0.915,<br>0.9303]  | <b>0.8716</b> |
| <b>Precision<br/>Finetuned on<br/>SKMCH&amp;RC Tested<br/>on SKMCH&amp;RC</b> | <b>0.7826</b><br>[0.7608,<br>0.8027] | <b>0.8328</b><br>[0.8175,<br>0.8529] | <b>0.8098</b><br>[0.7906,<br>0.8303] | <b>0.8243</b><br>[0.8016,<br>0.8424] |               | <b>0.8449</b><br>[0.8303, 0.8604] | <b>0.9115</b><br>[0.8967,<br>0.9225] | <b>0.8987</b><br>[0.8844,<br>0.9089] | <b>0.9093</b><br>[0.8947,<br>0.9184] |               |
| <b>Recall<br/>Finetuned on<br/>SKMCH&amp;RC Tested<br/>on SKMCH&amp;RC</b>    | <b>0.7812</b><br>[0.7639,<br>0.8007] | <b>0.8341</b><br>[0.8208,<br>0.8516] | <b>0.8188</b><br>[0.7994,<br>0.8388] | <b>0.8395</b><br>[0.8252,<br>0.8543] |               | <b>0.8704</b><br>[0.8556, 0.8846] | <b>0.9178</b><br>[0.9048,<br>0.9314] | <b>0.9076</b><br>[0.8981,<br>0.9214] | <b>0.9131</b><br>[0.8967,<br>0.9275] |               |
| <b>F1<br/>Finetuned on<br/>SKMCH&amp;RC Tested<br/>on SKMCH&amp;RC</b>        | <b>0.7819</b><br>[0.7659,<br>0.8017] | <b>0.8334</b><br>[0.8204,<br>0.8521] | <b>0.8142</b><br>[0.7993,<br>0.8343] | <b>0.8318</b><br>[0.8136,<br>0.8468] |               | <b>0.8575</b><br>[0.8449, 0.8717] | <b>0.9146</b><br>[0.9015,<br>0.9263] | <b>0.9031</b><br>[0.8912,<br>0.914]  | <b>0.9112</b><br>[0.8967,<br>0.9222] |               |
| <b>Accuracy<br/>Finetuned on<br/>SKMCH&amp;RC Tested<br/>on SKMCH&amp;RC</b>  | <b>0.9531</b><br>[0.9502,<br>0.9571] | <b>0.9399</b><br>[0.935,<br>0.9456]  | <b>0.934</b><br>[0.9281,<br>0.9407]  | <b>0.9382</b><br>[0.9319,<br>0.9431] |               | <b>0.9733</b><br>[0.9697, 0.9769] | <b>0.9761</b><br>[0.9733,<br>0.9792] | <b>0.9744</b><br>[0.9720,<br>0.9774] | <b>0.9737</b><br>[0.9700,<br>0.977]  |               |
| <b>Precision<br/>Finetuned on<br/>SKMCH&amp;RC Tested<br/>on Public</b>       | <b>0.4398</b><br>[0.4315,<br>0.4523] | <b>0.6317</b><br>[0.6217,<br>0.6429] | <b>0.6525</b><br>[0.6432,<br>0.6632] | <b>0.6274</b><br>[0.6172,<br>0.6384] |               | <b>0.6757</b><br>[0.6654, 0.686]  | <b>0.7317</b><br>[0.7244,<br>0.7399] | <b>0.712</b><br>[0.703,<br>0.7229]   | <b>0.7302</b><br>[0.724,<br>0.7378]  |               |
| <b>Recall<br/>Finetuned on<br/>SKMCH&amp;RC Tested<br/>on Public</b>          | <b>0.4068</b><br>[0.3963,<br>0.4194] | <b>0.5321</b><br>[0.5191,<br>0.5459] | <b>0.5948</b><br>[0.5811,<br>0.6094] | <b>0.5623</b><br>[0.5451,<br>0.5773] |               | <b>0.6291</b><br>[0.6166, 0.6463] | <b>0.6417</b><br>[0.6323,<br>0.6492] | <b>0.7112</b><br>[0.7002,<br>0.7253] | <b>0.6335</b><br>[0.6227,<br>0.646]  |               |
| <b>F1<br/>Finetuned on<br/>SKMCH&amp;RC Tested<br/>on Public</b>              | <b>0.4226</b><br>[0.4146,<br>0.4337] | <b>0.5776</b><br>[0.5671,<br>0.5879] | <b>0.6223</b><br>[0.6121,<br>0.6336] | <b>0.593</b><br>[0.5799,<br>0.6039]  |               | <b>0.6515</b><br>[0.643, 0.6625]  | <b>0.6837</b><br>[0.6774,<br>0.6899] | <b>0.7116</b><br>[0.7043,<br>0.7204] | <b>0.6784</b><br>[0.6722,<br>0.6871] |               |

|                                                            |                                   |                                  |                                   |                                |  |                                   |                                   |                                  |                                   |  |
|------------------------------------------------------------|-----------------------------------|----------------------------------|-----------------------------------|--------------------------------|--|-----------------------------------|-----------------------------------|----------------------------------|-----------------------------------|--|
| <b>Accuracy Finetuned on SKMCH&amp;RC Tested on Public</b> | <b>0.8199</b><br>[0.8161, 0.8243] | <b>0.8269</b><br>[0.8209, 0.832] | <b>0.8379</b><br>[0.8315, 0.8421] | <b>0.8363</b><br>[0.83, 0.842] |  | <b>0.9524</b><br>[0.9503, 0.9541] | <b>0.9363</b><br>[0.9337, 0.9386] | <b>0.9488</b><br>[0.947, 0.9505] | <b>0.9343</b><br>[0.9322, 0.9364] |  |
|------------------------------------------------------------|-----------------------------------|----------------------------------|-----------------------------------|--------------------------------|--|-----------------------------------|-----------------------------------|----------------------------------|-----------------------------------|--|

201

202 Table 4: Question answering model performance for internal and external validation of LLMs fine-tuned on publicly available and SKMCH&RC datasets. In

203 this table, each row indicates whether fine-tuning and testing were conducted on public or SKMCH&RC datasets.

| Model Name                                                      | GatorTron                         | BioMegatron                       | Clinical_BERT                     | Bio_BERT                          | ChatGPT                           |
|-----------------------------------------------------------------|-----------------------------------|-----------------------------------|-----------------------------------|-----------------------------------|-----------------------------------|
| <b>BLEU Finetuned on Public Tested on Public</b>                | <b>0.9089</b><br>[0.9047, 0.9135] | <b>0.9081</b><br>[0.9038, 0.9133] | <b>0.8853</b><br>[0.8808, 0.8892] | <b>0.9056</b><br>[0.9000, 0.9099] | <b>0.5651</b><br>[0.5526, 0.578]  |
| <b>ROUGE-L Finetuned on Public Tested on Public</b>             | <b>0.9532</b><br>[0.9486, 0.9573] | <b>0.9534</b><br>[0.9491, 0.9589] | <b>0.9336</b><br>[0.9278, 0.9386] | <b>0.9502</b><br>[0.9444, 0.9559] | <b>0.6264</b><br>[0.6134, 0.6403] |
| <b>BLEU Finetuned on Public Tested on SKMCH&amp;RC</b>          | <b>0.4630</b><br>[0.4552, 0.4711] | <b>0.5127</b><br>[0.5063, 0.5208] | <b>0.201</b><br>[0.1951, 0.2083]  | <b>0.2836</b><br>[0.2768, 0.2896] | <b>0.6621</b><br>[0.6555, 0.6699] |
| <b>ROUGE-L Finetuned on Public Tested on SKMCH&amp;RC</b>       | <b>0.5587</b><br>[0.5496, 0.5659] | <b>0.6037</b><br>[0.5960, 0.6098] | <b>0.2909</b><br>[0.2847, 0.299]  | <b>0.382</b><br>[0.3741, 0.3875]  | <b>0.742</b><br>[0.735, 0.7495]   |
| <b>BLEU Finetuned on SKMCH&amp;RC Tested on SKMCH&amp;RC</b>    | <b>0.8475</b><br>[0.8358, 0.8591] | <b>0.8222</b><br>[0.8077, 0.8367] | <b>0.7311</b><br>[0.7164, 0.7495] | <b>0.778</b><br>[0.7606, 0.7948]  |                                   |
| <b>ROUGE-L Finetuned on SKMCH&amp;RC Tested on SKMCH&amp;RC</b> | <b>0.8966</b><br>[0.8840, 0.9077] | <b>0.8766</b><br>[0.8658, 0.8864] | <b>0.7911</b><br>[0.7768, 0.8125] | <b>0.8408</b><br>[0.8269, 0.8553] |                                   |

|                                                                       |                                      |                                      |                                      |                                      |  |
|-----------------------------------------------------------------------|--------------------------------------|--------------------------------------|--------------------------------------|--------------------------------------|--|
| <b>BLEU<br/>Finetuned on<br/>SKMCH&amp;RC Tested<br/>on Public</b>    | <b>0.4671</b><br>[0.4601,<br>0.4736] | <b>0.483</b><br>[0.4739,<br>0.4918]  | <b>0.2888</b><br>[0.2812,<br>0.2987] | <b>0.3562</b><br>[0.3482,<br>0.3636] |  |
| <b>ROUGE-L<br/>Finetuned on<br/>SKMCH&amp;RC Tested<br/>on Public</b> | <b>0.5584</b><br>[0.5502,<br>0.5652] | <b>0.5666</b><br>[0.5587,<br>0.5754] | <b>0.3538</b><br>[0.3451,<br>0.3646] | <b>0.4254</b><br>[0.4161,<br>0.4329] |  |

204 In general, for open-source LLMs, including GatorTron, BioMegatron, ClinicalBERT, and  
205 BioBERT, when we fine-tuned the models on public data, their performance significantly  
206 reduced when tested on SKMCH&RC, and vice versa in both NLP tasks. This observation  
207 indicates the presence of bias in these models, likely stemming from inherent biases in the  
208 data sources on which these models were trained. Interestingly, ChatGPT, whose source  
209 training datasets are not fully disclosed, exhibited higher performance on SKMCH&RC  
210 compared to publicly accessible datasets. This pattern persisted across other performance  
211 metrics such as accuracy, precision, and recall for concept extraction and BLEU and  
212 ROUGE metrics for question answering task (Figure 2 a and b).

213 In general, LLMs fine-tuned on the SKMCH&RC training dataset resulted in the highest  
214 accuracy, precision, recall, and F1 score when tested on the SKMCH&RC test set.  
215 Specifically, the highest and lowest accuracy of 0.9531 (0.9502, 0.9571) and 0.934 (0.9281,  
216 0.9407) belongs to GatorTron and ClinicalBERT respectively and the highest and lowest F1  
217 score of 0.8334 (0.8204, 0.8521) and 0.7819 (0.7659, 0.8017) belongs to BioMegaTron and  
218 GatorTron in the dataset with 3-labels (I2B2). For the dataset with 9 labels (N2C2),  
219 BioMegaTron had the best performance with accuracy and F1 score of 0.9761 (0.9733,  
220 0.9792), 0.9146 (0.9015, 0.9263) respectively, and GatorTron had the worst performance  
221 with 0.9733 (0.9697, 0.9769) and 0.8575 (0.8449, 0.8717).

222 For question answering task, GatorTron performs the best with BLEU and ROUGE-L scores  
223 of 0.8475 (0.8358, 0.8591) and 0.8966 (0.884, 9077) and ClinicalBERT was the worst  
224 performing with 0.7311(0.7164, 7495) and 0.7911 (0.7768, 0.8125). ChatGPT produced  
225 BLEU of 0.6621 (0.6555, 0.6699) and ROUGE-L of 0.742 (0.735, 0.7495)

226 Models fine-tuned on public datasets I2B2 and N2C2 resulted in the highest accuracy,  
227 precision, recall, and F1 score when internally validated on their respective test sets. In the  
228 I2B2 dataset, GatorTron demonstrated superior performance in terms of accuracy, achieving  
229 a score of 0.9584 (0.9564, 0.9607). ClinicalBERT outperformed other models in recall and  
230 F1 score, attaining scores of 0.8791 (0.8679, 0.888) and 0.8701 (0.8623, 0.8746),

231 respectively. BioBERT exhibited the highest precision, recording a value of 0.0.8641 (0.8584,  
232 0.8704). Conversely, ChatGPT displayed the lowest performance across all metrics, yielding  
233 scores of 0.76 for accuracy, 0.8114 for precision, 0.7667 for F1 score, and 0.76 for recall.  
234 For the N2C2 dataset, GatorTron emerged as the top performer in terms of accuracy,  
235 precision, F1 score with 0.9934 (0.993, 0.9938), 0.9555 (0.9516, 0.9599), and 0.959  
236 (0.9556, 0.9628) respectively and BioBERT had the best Recall of 0.9678 (0.9653, 0.9714).  
237 In contrast, ChatGPT exhibited the least favourable performance on this dataset, achieving  
238 scores of 0.6978 for accuracy, 0.0.9124 for precision, 0.7496 for F1 score, and 0.6978 for  
239 recall.

240 Highest performing models for question answering in open dataset was GatorTron with the  
241 highest BLEU of 0.9089 (0.9047, 0.9135) and BioMegaTron with the highest ROUGE-L of  
242 0.9534 (0.9491, 0.9589) and ClinicalBERT had the worst BLEU and ROUGE-L of 0.8853  
243 (0.8808, 0.8892), and 0.9336 (0.9278, 0.9386) respectively. ChatGPT was evaluated with  
244 BLEU of 0.5651 (0.5526, 0.578) and ROUGE-L of 0.6264 (0.6134, 0.6403)

245 When models fine-tuned on public datasets I2B2 and N2C2 were evaluated on the  
246 SKMCH&RC test set with three labels, a significant decline in performance was observed  
247 compared to models fine-tuned specifically on SKMCH&RC, as illustrated in Figure 2a. This  
248 decline in performance persisted when evaluating the SKMCH&RC test set with nine labels  
249 (Figure 2b). A similar pattern was evident in the question answering task (Figure 2c).

250 Figure 3 presents the F1 scores of Language Models (LLMs) under different settings. Each  
251 LLM is depicted with a distinct colour, and the size of each circle corresponds to the F1  
252 score of the models. The circles are divided by a "/", where the text before the "/" indicates  
253 the dataset used for fine-tuning, and the text after the "/" signifies the datasets used for  
254 testing. Upon examination of the figure, a notable trend emerges: for each model designed  
255 to accommodate any number of labels, circles labelled with the same dataset for both fine-  
256 tuning and testing exhibit larger relative radii. This observed difference in radii can serve as

257 an indicator of the dissimilarity in distributions between the two datasets, providing valuable  
258 insights into the impact of dataset variations on model performance.

259 Figure 4 shows the label-specific misclassification performance for GatorTron, which had the  
260 largest drop in performance in internal (tested on I2B2) vs external validation (tested on  
261 SKMCH&RC). The left of Figure 4a showcases the absolute difference in model  
262 performances normalized by true labels, while the right highlights the differences between  
263 normalized confusion matrices based on predicted labels. Examining the diagonal elements  
264 of the matrices suggests differences in misclassification of all labels in the two testing  
265 datasets, with smaller differences observed in "B-Treatments." In the 9-label dataset (Figure  
266 4b), the smallest differences were in the classification of the "B-Drug", "B-Form", "B-  
267 Frequency", "I-Duration", and "I-Frequency" labels. A similar pattern was observed for the  
268 other LLMs.

269 Figure 5 displays two excerpts from sample notes within the SKMCH&RC dataset, each  
270 containing 9 labels (19 BIO labels), with true labels annotated by clinical experts and  
271 estimated labels generated by the GatorTron LLM. The 5a represents a snippet of text for  
272 which the LLM performed well in correctly predicting labels for the tokens, while 5b illustrates  
273 a case where the LLM performed poorly.

## 274 **Discussion**

275 In this study, we tested openly available medical LLMs in a real-world clinical setting in South  
276 Asia. Internal and external validation of the performance of these LLMs was performed, with  
277 and without fine-tuning to the local EHR dataset. We further tested how well LLMs fine-tuned  
278 on the local dataset perform when tested on open-source medical datasets.

279 In general, models fine-tuned on open datasets performed poorly on the local EHR  
280 database. However, the same models, when fine-tuned on the local EHR database,  
281 performed well when tested on the local EHR database, albeit poorly on open datasets.  
282 Interestingly, ChatGPT, whose source training datasets are not fully disclosed (at the time of



283 writing), was the exception to this trend, exhibiting better performance in terms of accuracy,  
284 F1 score, precision, recall, BLEU, ROUGE-L when tested on SKMCH&RC compared to  
285 publicly accessible datasets.

286 Our findings indicate that off-the-shelf LLMs can be biased when directly applied in real-  
287 world clinical settings. This is unsurprising given that the LLMs used in the study were  
288 trained on open-source datasets that are not representative of data from the real-world  
289 clinical setting we investigated. However, our results also showed it is possible to reduce  
290 such data-driven bias by fine-tuning the models on local data, under expert supervision. By  
291 doing so, the models can be made more equitably tailored to the local clinical needs.

292 The equitable use of LLMs entails several considerations. LLMs that do not perpetuate data-  
293 generated and algorithmic biases can make this powerful technology beneficial for diverse  
294 patient populations in resource-limited, overburdened settings. However, for these models to  
295 be applicable in a localised setting, the training data must be representative of these  
296 populations. We know that most research-ready medical data perpetuate the digital divide,  
297 overrepresenting high-income geographies and populations, which results in algorithmic  
298 assumptions about gender, race, geography and socio-economic status, etc. On the other  
299 hand, local data used in isolation is often sparse and ungeneralisable. As demonstrated in  
300 this study, fine-tuning is one way to reduce data-driven biases which can result in health  
301 inequity. It can also help to save time and resources over training an LLM from scratch,  
302 which can otherwise be prohibitively time and resource-intensive and requires expensive  
303 computing infrastructure which renders it inaccessible to healthcare providers in resource-  
304 limited settings. Tailoring to local data and context can also help alleviate the issue of  
305 hallucination and confabulation in LLMs, where a model can produce made-up or clinically  
306 nonsensical results. Reducing the likelihood of these outputs increases the validity and  
307 applicability of LLMs in health care and makes the models more trustworthy for clinicians.

308 However, there are several key challenges in making models equitable in practice. Real-  
309 world data such as EHR databases are not pre-designed for LLM applications. The manual  
310 labelling of data, and re-structuring of clinical notes to conform to the required formatting of  
311 LLMs is time-consuming and demanding for busy clinician experts, preventing rapid  
312 development of suitably accurate and unbiased models. Their production also requires close  
313 collaboration between clinicians, data scientists and IT specialists, which further complicates  
314 the generation of models. For example, it is particularly important to ensure that LLM-  
315 generated responses are rigorously validated and that any potential biases or inaccuracies  
316 are identified, communicated, and corrected with adequate transparency. In addition, ethical  
317 concerns around the sharing of patient data necessitate privacy-preserving measures for  
318 these data sources.

319 In this work, we fine-tuned locally running, privacy-preserving LLMs within a federated  
320 learning framework that precluded the need for patient data sharing. This is just one of the  
321 strengths of this research; to our knowledge, this is one of the few studies investigating the  
322 use of LLM technology in the global South, and the first study from Pakistan. All LLMs used  
323 in this work are publicly available (except for ChatGPT, which requires a paid subscription),  
324 rendering this approach reproducible in other settings without access and cost constraints.  
325 Models were tested on two forms of clinical notes (DS and SOAP notes) for the task of  
326 parsing clinical notes, making the approach disease-agnostic and generalisable. This work  
327 can be applied to further downstream tasks such as summarising and extracting key  
328 information for busy clinicians, answering medical questions, organising patient workups and  
329 other instances of clinical task-shifting.

330 Fair AI fundamentally relies on locally-driven co-creation of models that are 1) trained on  
331 locally representative bias-aware datasets, 2) account for algorithmic bias in the modelling  
332 process, 3) incorporate transparent reporting, and 4) are subjected to independent, context-  
333 aware internal and external validation to ensure local use and generalisability. The strengths

334 of this study lie in its demonstration of how these models can be produced, presenting the  
335 feasibility and value of producing localised LLMs in this way.

336 Inevitably our study has some limitations. The findings reflect the performance of models on  
337 a random subset of clinical notes extracted from one EHR dataset in South Asia. While this  
338 EHR dataset has national coverage and is therefore representative of data from the general  
339 population of Pakistan in terms of socio-demographics and medical history, it represents a  
340 smaller-scale basis for LLM training. The key to successful health innovation lies in its  
341 reliability and perception as fit for use by the populations of interest and key stakeholders.  
342 Alongside increasing the scale of training data, future work should also focus on the  
343 challenges of creating clinical LLMs trusted by doctors, nurses, and front-line staff, and how  
344 these users envision the future role of these models in patient care. The testing of these  
345 models in patient care will not only allow further analysis of their technical validity but also  
346 allow patients and clinicians to discuss the cultural and ethical acceptability of novel health-  
347 focused LLM technology in local health settings. This is an important first step to ensure that  
348 local stakeholders have agency and ownership in the development of transformative health  
349 technology, including LLMs, going forwards, in ways that make them safe, fair and beneficial  
350 for all.

## 351 **Conclusions**

352 Despite the elevated interest in LLMs, their assessment in real-world clinical settings is  
353 lacking. This study evaluates the feasibility of equitable access and use of LLMs for clinical  
354 decision-making by assessing the performance of medical LLMs on a local dataset from a  
355 hospital in Pakistan. Given that most medical datasets suffer from the digital divide, we  
356 tested and independently validated LLMs on a large local EHR database. The database was  
357 first labelled by a team of clinical experts from the setting in context through expert  
358 consensus to review to contest and redress algorithmic decisions. To minimise algorithmic  
359 bias, we compared model performance with and without fine-tuning the LLMs to the local  
360 dataset.

361 We recognise that equitable use of health innovations extends well beyond considerations of  
362 technological bias; it necessitates consideration of clinical explainability, acceptability, trust  
363 and local ownership such as can be assessed through regular stakeholder engagement and  
364 interaction. This is an important avenue for future research to ensure clinical practitioners,  
365 decision-makers, and patients and carers have agency and ownership in the development  
366 and implementation of transformative health technology including LLMs going forward.

367 In conclusion, our findings highlight the presence of data-driven and algorithmic biases in  
368 existing publicly available clinical LLMs predominantly pre-trained on data from global north  
369 settings. This work indicates that pre-trained LLMs can be tailored for parsing clinical notes  
370 in specific clinical contexts, but only through careful consideration of multi-dimensional  
371 biases. It emphasizes the need for continued scrutiny of LLMs and suitable corrective  
372 measures, such as regular fine-tuning on local data under the supervision of local context-  
373 aware clinical experts.

### 374 **Acknowledgements**

375 This study was funded by Bill & Melinda Gates Foundation (INV-062576). We would like to  
376 acknowledge Amelia M. Doran from the University of Oxford for editing support.

### 377 **References**

- 378 [1]. Thirunavukarasu AJ, Ting DS, Elangovan K, et al. Large language models in  
379 medicine. *Nat Med*. 2023;29(8):1930-40.
- 380 [2]. Clusmann J, Kolbinger FR, Muti HS, et al. The future landscape of large language  
381 models in medicine. *Communications Medicine*. 2023 10;3(1):141.
- 382 [3]. Ayers JW, Poliak A, Dredze M, et al. Comparing physician and artificial intelligence  
383 chatbot responses to patient questions posted to a public social media forum. *JAMA*  
384 *Intern*. 2023 28.

- 385 [4]. Kung TH, Cheatham M, Medenilla A, et al. Performance of ChatGPT on USMLE:  
386 Potential for AI-assisted medical education using large language models. *PLoS digital*  
387 *health*. 2023 9;2(2):e0000198.
- 388 [5]. Moor M, Banerjee O, Abad ZS, et al. Foundation models for generalist medical  
389 artificial intelligence. *Nature*. 2023 13;616(7956):259-65.
- 390 [6]. Kaplan J, McCandlish S, Henighan T, et al. Scaling laws for neural language models.  
391 *ArXiv:2001.08361*. submitted Jan 23, 2020. <https://doi.org/10.48550/arXiv.2001.08361>
- 392 [7]. Shoyebi M, Patwary M, Puri R, et al. Megatron-lm: Training multi-billion parameter  
393 language models using model parallelism. *ArXiv:1909.08053*. submitted Sep 17, 2019.  
394 <https://doi.org/10.48550/arXiv.1909.08053>
- 395 [8]. Thoppilan R, De Freitas D, Hall J, et al. Lamda: Language models for dialog  
396 applications. *ArXiv:2201.08239*. submitted Jan 20, 2022.  
397 <https://doi.org/10.48550/arXiv.2201.08239>
- 398 [9]. Zeng A, Liu X, Du Z, et al. Glm-130b: An open bilingual pre-trained model.  
399 *ArXiv:2210.02414*. submitted Oct 5, 2022. <https://doi.org/10.48550/arXiv.2210.02414>
- 400 [10]. Amatriain X, Sankar A, Bing J, et al. Transformer models: an introduction and  
401 catalog. *ArXiv:2302.07730*. submitted Feb 12, 2023.  
402 <https://doi.org/10.48550/arXiv.2302.07730>
- 403 [11]. Shah NH, Entwistle D, Pfeffer MA. Creation and adoption of large language models  
404 in medicine. *JAMA*. 2023 5;330(9):866-9.
- 405 [12]. Rahaman MS, Ahsan MT, Anjum N, et al. From ChatGPT-3 to GPT-4: a significant  
406 advancement in ai-driven NLP tools. *Journal of Engineering and Emerging*  
407 *Technologies*. 2023 11;2(1):1-1.
- 408 [13]. Rosenbloom ST, Denny JC, Xu H, et al. Data from clinical notes: a perspective on the  
409 tension between structure and flexible documentation. *JAMIA*. 2011 1;18(2):181-6.
- 410 [14]. Celi LA, Cellini J, Charpignon ML, et al. Sources of bias in artificial intelligence that  
411 perpetuate healthcare disparities—A global review. *PLOS digital health*. 2022  
412 31;1(3):e0000022.

- 413 [15]. Straw I, Callison-Burch C. Artificial Intelligence in mental health and the biases of  
414 language based models. *PloS one*. 2020 17;15(12):e0240376.
- 415 [16]. Lee P, Bubeck S, Petro J. Benefits, limits, and risks of GPT-4 as an AI chatbot for  
416 medicine. *NEJM*. 2023 30;388(13):1233-9.
- 417 [17]. Azamfirei R, Kudchadkar SR, Fackler J. Large language models and the perils of  
418 their hallucinations. *Crit Care*. 2023;27(1):1-2.
- 419 [18]. Junior EP, Normando P, Flores-Ortiz R, et al. Integrating real-world data from Brazil  
420 and Pakistan into the OMOP common data model and standardized health analytics  
421 framework to characterize COVID-19 in the Global South. *JAMIA*. 2023 1;30(4):643-55.
- 422 [19]. Yang X, Chen A, PourNejatian N, et al. A large language model for electronic health  
423 records. *NPJ Digital Medicine*. 2022 26;5(1):194.
- 424 [20]. Shin HC, Zhang Y, Bakhturina E, et al. BioMegatron: Larger biomedical domain  
425 language model. *ArXiv:2010.06060*. submitted Oct 12, 2020.  
426 <https://doi.org/10.48550/arXiv.2010.06060>
- 427 [21]. Alsentzer E, Murphy JR, Boag W, et al. Publicly available clinical BERT embeddings.  
428 *ArXiv:1904.03323*. submitted Apr 6, 2019. <https://doi.org/10.48550/arXiv.1904.03323>
- 429 [22]. Lee J, Yoon W, Kim S, et al. BioBERT: a pre-trained biomedical language  
430 representation model for biomedical text mining. *Bioinformatics*. 2020 15;36(4):1234-40.

### 431 **Figure Legends:**

432 Figure 1: Study Design for assessing bias of LLMs in real-world clinical settings. Internal and  
433 external validation was undertaken with and without fine-tuning on real-world data.

434 Figure 2: Difference between performance on public and SKMCH&RC data compared  
435 between models. a) compares 3-label performance, b) compares 9-label performance.

436 Figure 3: Comparative Analysis of LLMs F1 Scores Across Varied Settings, Highlighting  
437 Dataset-Dependent Performance Disparities. The circle radius corresponds with F1 score –  
438 larger circles depict higher scores.

439 Figure 4: Absolute Differences in Normalized Confusion Matrices between true and predicted  
440 labels. The left tables show normalized to true labels, and the right tables show normalized  
441 to predicted labels; a) shows the 3-label I2B2 dataset difference to SKMCH&RC data, b)  
442 shows the 9-label N2C2 and SKMCH&RC data.

443 Figure 5: LLM labelling of 2 different clinical notes examples, demonstrating where the  
444 model performs well (a) and performs badly (b). Red boxes indicate misclassified labels;  
445 both examples were labelled by the GatorTron LLM using the 9-label classifications.
